# Supplementary material for: Inhibition of Inflammatory Cytokine Expression Prevents High-Fat Diet-Induced Kidney Injury: Role of Lingonberry Supplementation
Source: PubMed Central journal article supplement (PMC7119336; doi:10.3389/fmed.2020.00080), 2020-03-27
Supplement: Data_Sheet_2.pdf [file Data_Sheet_2.pdf]

## Supplementary Material 2

### Materials and Method

Measurement of mRNA Expression: Relative mRNA expression of transforming growth factor beta (TGF- $\beta$ ) in mouse kidney tissues were measured using a StepOne Plus Real-Time qPCR (RT-qPCR) system as described in the materials and methods. The qPCR reaction mixture was subjected to initial denaturation at 95°C for 3 mins followed by 45 cycles of denaturation step 95°C, 10 s and annealing. Annealing temperature was set at 58°C for 30 s.

**Supplementary Table 1.** Mouse TGF- $\beta$  primer sequence used for RT-qPCR

| Primer       | Sequence 5' - 3'            | Accession Number | Product length |
|--------------|-----------------------------|------------------|----------------|
| TGF- $\beta$ | F: TACCATGCCAACTTCTGTCTGGGA | NM_011577.2      | 196 bp         |
|              | R: TGTTGGACAACCTGCTCCACCTTG |                  |                |

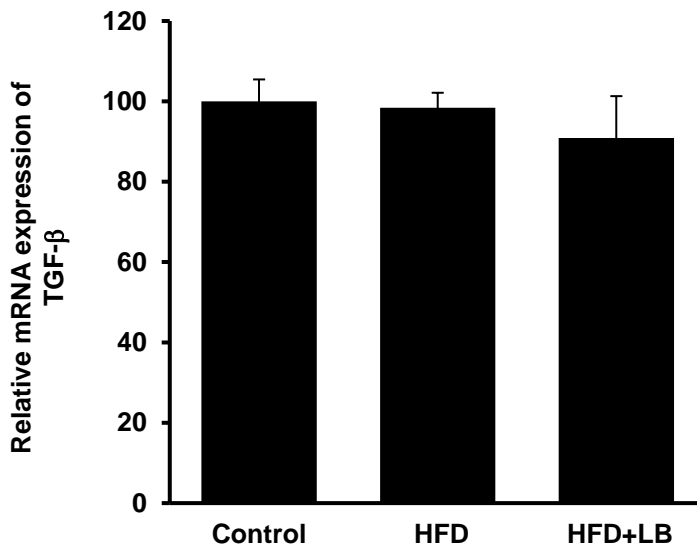

**Supplementary Figure 2.** Expression of transforming growth factor- $\beta$  in the mouse kidneys

Mice were fed a control diet, high-fat diet (HFD) or HFD supplemented with lingonberry (HFD+LB) for 12 weeks. The mRNA expression of TGF- $\beta$  in kidneys are expressed as the means  $\pm$  SE ( $n=6$ ). \* $p < 0.05$  when compared with the value obtained from the control group. # $p < 0.05$  when compared with the value obtained from the HFD group.
